# Supplementary material for: Assessment of Penalty-Free Multi-Objective Evolutionary Optimization Approach for the Design and Rehabilitation of Water Distribution Systems
Source: Springer Nature journal article supplement (doi:10.1007/s11269-013-0488-8), 2013-12-19
Supplement: MOESM1 [file 11774414]

## Appendix — Supplementary Material

Journal: Water Resources Management

Article Title: Assessment of Penalty-free Multi-objective Evolutionary Optimization Approach for the Design and Rehabilitation of Water Distribution Systems

Authors: Calvin Siew, Tiku T. Tanyimboh and Alemtsehay G. Seyoum

### Authors and Affiliations

Calvin Siew, PhD

Department of Civil and Environmental Engineering, University of Strathclyde Glasgow.  
John Anderson Building, 107 Rottenrow, Glasgow G4 0NG, UK.  
Email: calvin.siew@strath.ac.uk.

Tiku T Tanyimboh, PhD (Corresponding Author)

Department of Civil and Environmental Engineering, University of Strathclyde Glasgow.  
John Anderson Building, 107 Rottenrow, Glasgow G4 0NG, UK.  
Email: tiku.tanyimboh@strath.ac.uk.  
Tel. +44 (0)141 548 4366

Alemtsehay G Seyoum, MSc

Department of Civil and Environmental Engineering, University of Strathclyde Glasgow.  
John Anderson Building, 107 Rottenrow, Glasgow G4 0NG, UK.  
Email: alemtsehay.seyoum@strath.ac.uk.

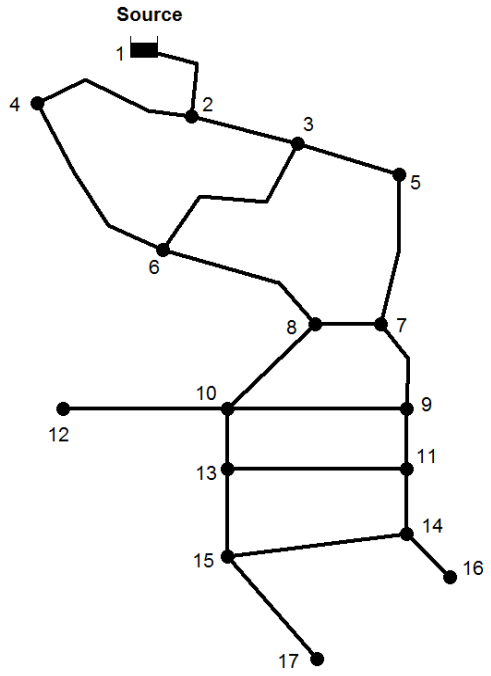

(a) Wobulenzi network

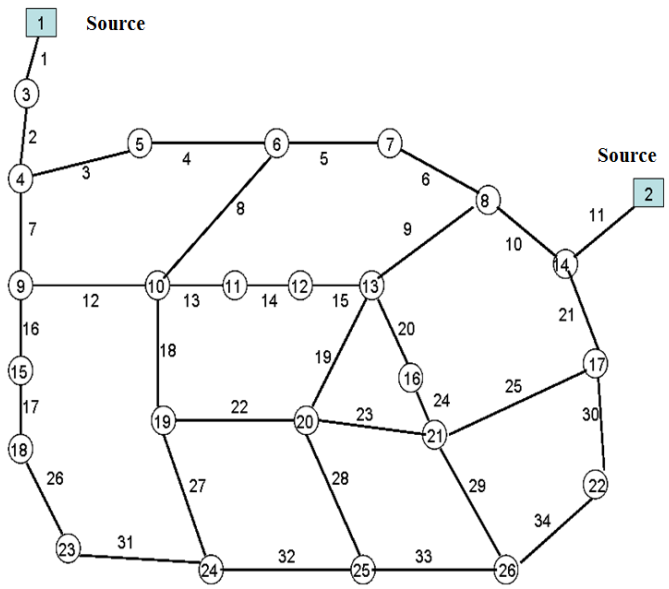

(b) Kadu network

**Figure 4** Layouts of the Wobulenzi (a) and Kadu (b) water distribution networks

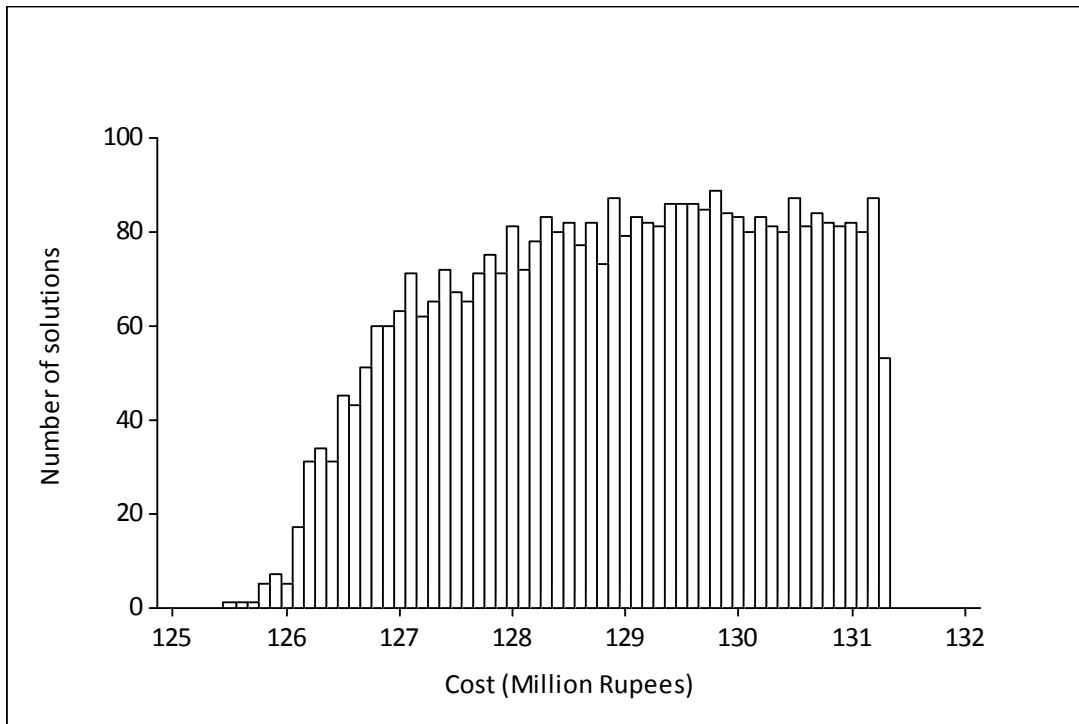

**Figure 5** Distribution of the individual solutions found (3834 in total) in 705 optimization runs that are feasible and cheaper than the previous best solution.

The solutions here include the solutions found in the 30 optimization runs with the default values of the coefficients of the Hazen-Williams formula in EPANET 2. Approximately 20-25 solutions in total (out of 3834) may be considered theoretically borderline in terms of feasibility due to modelling and unit conversion errors including minor differences between EPANET 2 and EPANET-PDX. For these theoretically borderline solutions, the shortfall in the residual head at the node with the smallest pressure may be up to about 2 cm approximately.

**Table 4** Details of the new solutions for the Wobulenzi network

|       |                             | Phase I       |            |            | Phase II       |           |                |           |                |           |
|-------|-----------------------------|---------------|------------|------------|----------------|-----------|----------------|-----------|----------------|-----------|
|       |                             | Diameter (mm) |            |            | Solution 1     |           | Solution 2     |           | Solution 3     |           |
| Link  | Failure factor <sup>a</sup> | Solution 1    | Solution 2 | Solution 3 | Upgrade option | Dia. (mm) | Upgrade option | Dia. (mm) | Upgrade option | Dia. (mm) |
| 1-2   | 1.5                         | 250           | 250        | 250        | Parallel       | 350       | Parallel       | 250       | Parallel       | 300       |
| 2-3   | 1.5                         | 200           | 200        | 250        | Parallel       | 300       | Parallel       | 300       | -              | -         |
| 2-4   | 1.5                         | 150           | 150        | 150        | -              | -         | -              | -         | -              | -         |
| 3-5   | 1.5                         | 200           | 150        | 100        | Replace        | 350       | -              | -         | Parallel       | 300       |
| 3-6   | 1.5                         | 80            | 200        | 200        | -              | -         | -              | -         | -              | -         |
| 4-6   | 3.0                         | 80            | 80         | 80         | -              | -         | -              | -         | -              | -         |
| 5-7   | 3.0                         | 200           | 100        | 80         | -              | -         | -              | -         | Parallel       | 250       |
| 6-8   | 3.0                         | 80            | 150        | 200        | -              | -         | Replace        | 300       | -              | -         |
| 7-8   | 3.0                         | 80            | 80         | 80         | Replace        | 300       | -              | -         | Replace        | 200       |
| 7-9   | 3.0                         | 150           | 100        | 100        | -              | -         | -              | -         | -              | -         |
| 8-10  | 3.0                         | 80            | 150        | 200        | Parallel       | 200       | Replace        | 250       | -              | -         |
| 9-10  | 3.0                         | 80            | 80         | 80         | -              | -         | -              | -         | -              | -         |
| 9-11  | 5.0                         | 200           | 80         | 80         | -              | -         | -              | -         | -              | -         |
| 10-12 | 3.0                         | 80            | 80         | 80         | -              | -         | -              | -         | -              | -         |
| 10-13 | 5.0                         | 80            | 150        | 150        | -              | -         | -              | -         | Replace        | 250       |
| 11-13 | 3.0                         | 80            | 80         | 80         | -              | -         | -              | -         | -              | -         |
| 11-14 | 3.0                         | 100           | 100        | 150        | -              | -         | -              | -         | -              | -         |
| 13-15 | 3.0                         | 80            | 100        | 80         | Replace        | 150       | Parallel       | 150       | Replace        | 200       |
| 14-15 | 3.0                         | 80            | 80         | 80         | -              | -         | -              | -         | -              | -         |
| 14-16 | 3.0                         | 80            | 80         | 80         | -              | -         | -              | -         | -              | -         |
| 15-17 | 1.0                         | 100           | 100        | 80         | -              | -         | -              | -         | -              | -         |

<sup>a</sup>From Tanyimboh and Kalungi 2008; failure factors are largely predetermined by land use.

**Table 5** Comparison of alternative solutions for the Kadu network

| Pipe ID       | Diameter (mm)           |                             |             |                         |             |
|---------------|-------------------------|-----------------------------|-------------|-------------------------|-------------|
|               | Full Solution Space     |                             |             | Reduced Solution Space  |             |
|               | Kadu <i>et al.</i> 2008 | Haghighi <i>et al.</i> 2011 | PF-MOEA     | Kadu <i>et al.</i> 2008 | PF-MOEA     |
| 1             | 1000                    | 1000                        | 900         | 1000                    | 900         |
| 2             | 900                     | 900                         | 900         | 900                     | 900         |
| 3             | 400                     | 400                         | 350         | 350                     | 400         |
| 4             | 350                     | 350                         | 300         | 250                     | 250         |
| 5             | 150                     | 150                         | 150         | 150                     | 150         |
| 6             | 250                     | 250                         | 250         | 250                     | 200         |
| 7             | 800                     | 800                         | 800         | 800                     | 800         |
| 8             | 150                     | 150                         | 150         | 150                     | 150         |
| 9             | 400                     | 400                         | 450         | 600                     | 600         |
| 10            | 500                     | 500                         | 500         | 700                     | 600         |
| 11            | 1000                    | 1000                        | 900         | 900                     | 900         |
| 12            | 700                     | 700                         | 700         | 700                     | 700         |
| 13            | 800                     | 800                         | 500         | 500                     | 500         |
| 14            | 400                     | 400                         | 500         | 450                     | 500         |
| 15            | 150                     | 150                         | 150         | 150                     | 150         |
| 16            | 500                     | 500                         | 500         | 450                     | 500         |
| 17            | 350                     | 350                         | 350         | 350                     | 350         |
| 18            | 350                     | 350                         | 400         | 400                     | 350         |
| 19            | 150                     | 150                         | 150         | 450                     | 450         |
| 20            | 200                     | 150                         | 150         | 150                     | 150         |
| 21            | 700                     | 700                         | 700         | 600                     | 600         |
| 22            | 150                     | 150                         | 150         | 150                     | 150         |
| 23            | 400                     | 450                         | 450         | 150                     | 150         |
| 24            | 400                     | 400                         | 350         | 400                     | 350         |
| 25            | 700                     | 700                         | 700         | 500                     | 600         |
| 26            | 250                     | 250                         | 250         | 200                     | 250         |
| 27            | 250                     | 250                         | 250         | 350                     | 300         |
| 28            | 200                     | 200                         | 300         | 250                     | 300         |
| 29            | 300                     | 300                         | 200         | 150                     | 200         |
| 30            | 300                     | 300                         | 250         | 300                     | 300         |
| 31            | 200                     | 200                         | 150         | 150                     | 150         |
| 32            | 150                     | 150                         | 150         | 150                     | 150         |
| 33            | 250                     | 200                         | 150         | 150                     | 150         |
| 34            | 150                     | 150                         | 150         | 200                     | 150         |
| Cost (Rupees) | 131,678,935             | 131,312,815                 | 125,460,980 | 126,368,865             | 125,826,425 |
| Evaluations   | 120,000 <sup>a</sup>    | 4,440 <sup>a</sup>          | 436,000     | 25,200 <sup>a</sup>     | 82,400      |

<sup>a</sup>Infeasible solutions (based on EPANET 2 with  $\alpha = 1.85$ ;  $\beta = 4.87$ ;  $\omega = 10.68$ )

**Table 6** Comparison of nodal heads from alternative solutions of the Kadu network

| Node ID                     | Required head (m) | Available head (m) (based on EPANET 2 with $\alpha=1.85$ ; $\beta=4.87$ ; $\omega=10.68$ ) |                                          |             |                                      |             |
|-----------------------------|-------------------|--------------------------------------------------------------------------------------------|------------------------------------------|-------------|--------------------------------------|-------------|
|                             |                   | Full Solution Space                                                                        |                                          |             | Reduced Solution Space               |             |
|                             |                   | Kadu <i>et al.</i> 2008 <sup>a</sup>                                                       | Haghighi <i>et al.</i> 2011 <sup>a</sup> | PF-MOEA     | Kadu <i>et al.</i> 2008 <sup>a</sup> | PF-MOEA     |
| 1 <sup>b</sup>              | 100.00            | 100.00                                                                                     | 100.00                                   | 100.00      | 100.00                               | 100.00      |
| 2 <sup>b</sup>              | 95.00             | 95.00                                                                                      | 95.00                                    | 95.00       | 95.00                                | 95.00       |
| 3                           | 85.00             | 98.95                                                                                      | 98.96                                    | 98.28       | 98.98                                | 98.26       |
| 4                           | 85.00             | 95.65                                                                                      | 95.66                                    | 95.04       | 95.76                                | 94.98       |
| 5                           | 85.00             | 90.85                                                                                      | 90.85                                    | 87.47       | 88.79                                | 90.68       |
| 6                           | 85.00             | 89.40                                                                                      | 89.41                                    | 85.63       | 85.28                                | 85.07       |
| 7                           | 82.00             | 87.75                                                                                      | 87.73                                    | 85.83       | 87.99                                | 82.95       |
| 8                           | 82.00             | 89.99                                                                                      | 89.96                                    | 88.82       | 91.62                                | 89.35       |
| 9                           | 85.00             | 91.77                                                                                      | 91.79                                    | 91.12       | 91.83                                | 91.05       |
| 10                          | 85.00             | 89.05                                                                                      | 89.08                                    | 88.30       | 88.88                                | 88.22       |
| 11                          | 85.00             | 88.85                                                                                      | 88.88                                    | 86.42       | 87.1                                 | 86.38       |
| 12                          | 85.00             | 84.98*<br>(0.02)                                                                           | 85.01                                    | 85.13       | 85.13                                | 85.12       |
| 13                          | 82.00             | 82.02                                                                                      | 81.88*<br>(0.12)                         | 83.25       | 86.73                                | 84.85       |
| 14                          | 82.00             | 94.49                                                                                      | 94.49                                    | 94.14       | 94.13                                | 94.15       |
| 15                          | 85.00             | 88.44                                                                                      | 88.46                                    | 87.97       | 87.11                                | 87.92       |
| 16                          | 82.00             | 84.53                                                                                      | 84.81                                    | 83.11       | 82.05                                | 83.04       |
| 17                          | 82.00             | 90.88                                                                                      | 90.88                                    | 90.69       | 90.29                                | 90.04       |
| 18                          | 85.00             | 85.46                                                                                      | 85.47                                    | 85.39       | 85.24                                | 85.39       |
| 19                          | 82.00             | 85.11                                                                                      | 85.24                                    | 86.14       | 85.93                                | 83.82       |
| 20                          | 82.00             | 82.1                                                                                       | 83.78                                    | 83.15       | 83.72                                | 82.07       |
| 21                          | 82.00             | 87.39                                                                                      | 87.38                                    | 87.37       | 83.98                                | 87.00       |
| 22                          | 80.00             | 86.45                                                                                      | 86.55                                    | 80.69       | 84.8                                 | 85.50       |
| 23                          | 82.00             | 82.09                                                                                      | 82.07                                    | 82.96       | 82.17                                | 83.05       |
| 24                          | 80.00             | 79.94*<br>(0.06)                                                                           | 79.89*<br>(0.11)                         | 80.28       | 83.63                                | 80.86       |
| 25                          | 80.00             | 79.96*<br>(0.04)                                                                           | 79.77*<br>(0.23)                         | 81.10       | 80.15                                | 80.54       |
| 26                          | 80.00             | 82.87                                                                                      | 84.04                                    | 80.04       | 78.38*<br>(1.62)                     | 80.39       |
| Total shortfall in head (m) |                   | 0.12 <sup>a</sup>                                                                          | 0.46 <sup>a</sup>                        | 0.00        | 1.62 <sup>a</sup>                    | 0.00        |
| Cost (Rupees)               |                   | 131,678,935                                                                                | 131,312,815                              | 125,460,980 | 126,368,865                          | 125,826,425 |
| Function evaluations        |                   | 120,000                                                                                    | 4,440                                    | 436,000     | 25,200                               | 82,400      |

<sup>a</sup> Infeasible solutions; the asterisk indicates a shortfall in head (shown in parentheses).

<sup>b</sup> Reservoir (i.e. source with constant head).
